# Supplementary material for: The structural properties of silicon-doped DBrTBT/ZnSe solar cell materials: a theoretical study
Source: Royal Society of Chemistry journal article supplement (doi:10.1039/d0nj02813d), 2020-01-01
Supplement: d0nj02813d1.pdf [file d0nj02813d1.pdf]

## Supporting Information

For

# The structural properties for silicon-doped DBrTBT/ZnSe solar cells materials: A theoretical study

Fulan Zhang<sup>1</sup>, Binfang Yuan<sup>1</sup>, Jianhua Xu<sup>1</sup>, Huisheng Huang<sup>1</sup>, Laicai Li<sup>2\*</sup>

*1*Chongqing Key Laboratory of Inorganic Special Functional Materials, College of Chemistry and Chemical Engineering, Yangtze Normal University, Fuling 408100, China

*2* College of Chemistry and Material Science, Sichuan Normal University, Chengdu 610066, China

\*Corresponding author: E-mail: lilcmail@163.com; Tel: +86 28 84760802

**Fig. S1.** Optimized geometric structures of the DBrTBT.

**Fig. S2.** Optimized geometric structures of the benzene ring C(1) atom replaced by Si atom in the DBrTBT, DBrTBT-Si(1) for short.

**Fig. S3.** Optimized geometric structures of the benzene ring C(2) atom replaced by Si atom in the DBrTBT, DBrTBT-Si(2) for short.

**Fig. S4.** Optimized geometric structures of the benzene ring C(6) atom replaced by Si atom in the DBrTBT, DBrTBT-Si(6) for short.

**Fig. S5.** Mulliken atomic charges of the DBrTBT.

**Fig. S6.** Mulliken atomic charges of the DBrTBT-Si(1).

**Fig.S7.** Mulliken atomic charges of the first layer Zn and the second layer Se atoms on the ZnSe(100).

**Fig.S8.** Mulliken atomic charges of the first layer Zn and the second layer Se atoms on the ZnSe(111).

**Fig.S9.** Mulliken atomic charges of part of the atoms on the ZnSe(100)-DBrTBT.

**Fig. S10.** Mulliken atomic charges of part of the atoms on the ZnSe(100)-DBrTBT-Si(1).

**Fig. S11.** Mulliken atomic charges of part of the atoms on the ZnSe(111)-DBrTBT.

**Fig. S12.** Mulliken atomic charges of part of the atoms on the ZnSe(111)-DBrTBT-Si(1).

**Fig. S13.** Electron density plots (EDPs) of the highest occupied molecular orbital (HOMO) and the lowest unoccupied molecular orbital (LUMO).

**Table S1.** The origin data of absorption bands for the DBrTBT and DBrTBT-Si(x) (x=1, 2, 6) by GGA/PW91 function and RPA TD-DFT method.

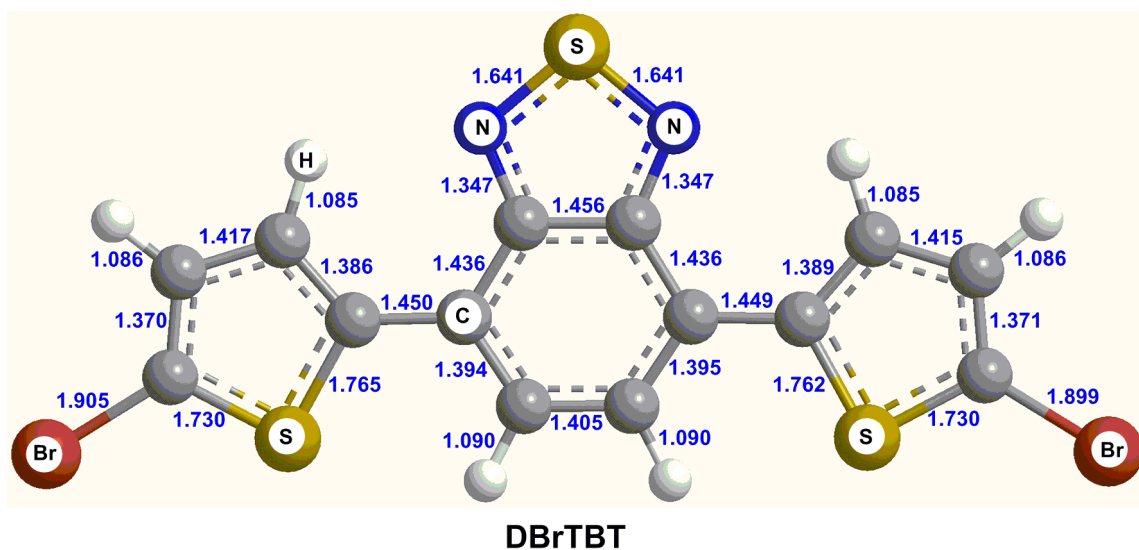

**Fig. S1.** Optimized geometric structures of the DBrTBT. The structural parameters were clearly labeled. The unit of bond length is Å.

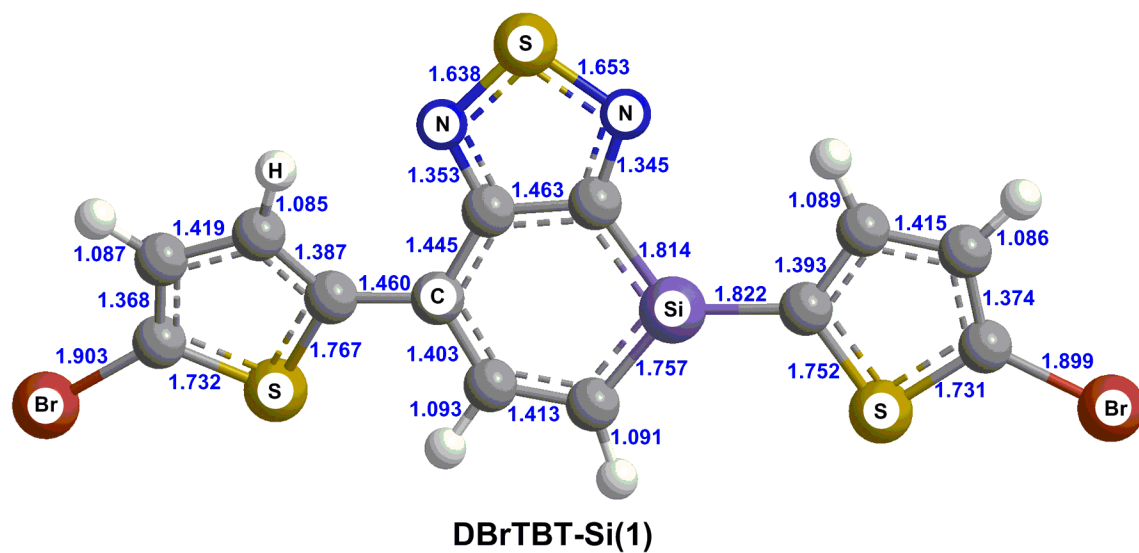

**Fig. S2.** Optimized geometric structures of the benzene ring C(1) atom replaced by Si atom in the DBrTBT, DBrTBT-Si(1) for short. The structural parameters were clearly labeled. The unit of bond length is Å.

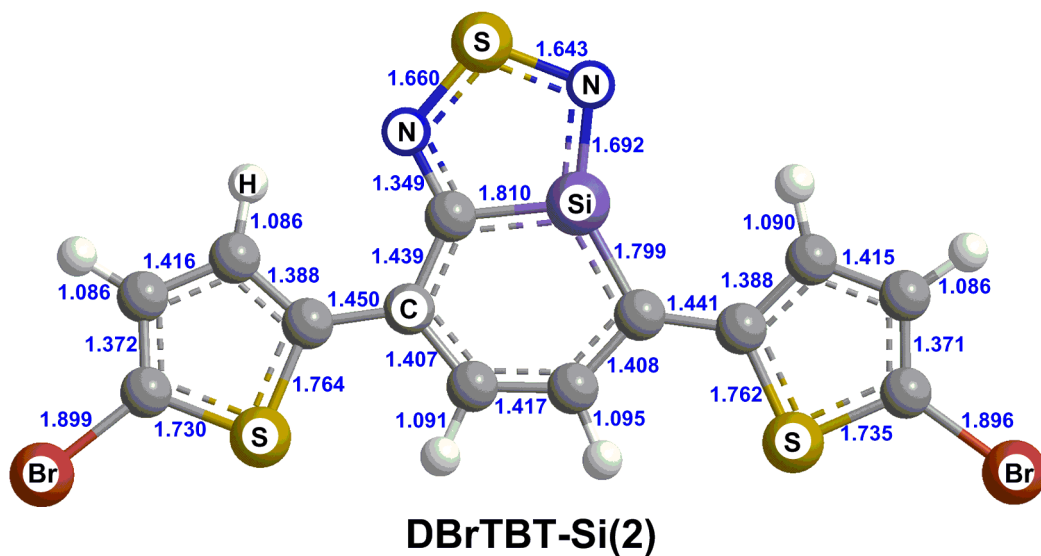

**Fig. S3.** Optimized geometric structures of the benzene ring C(2) atom replaced by Si atom in the DBrTBT, DBrTBT-Si(2) for short. The structural parameters were clearly labeled. The unit of bond length is Å.

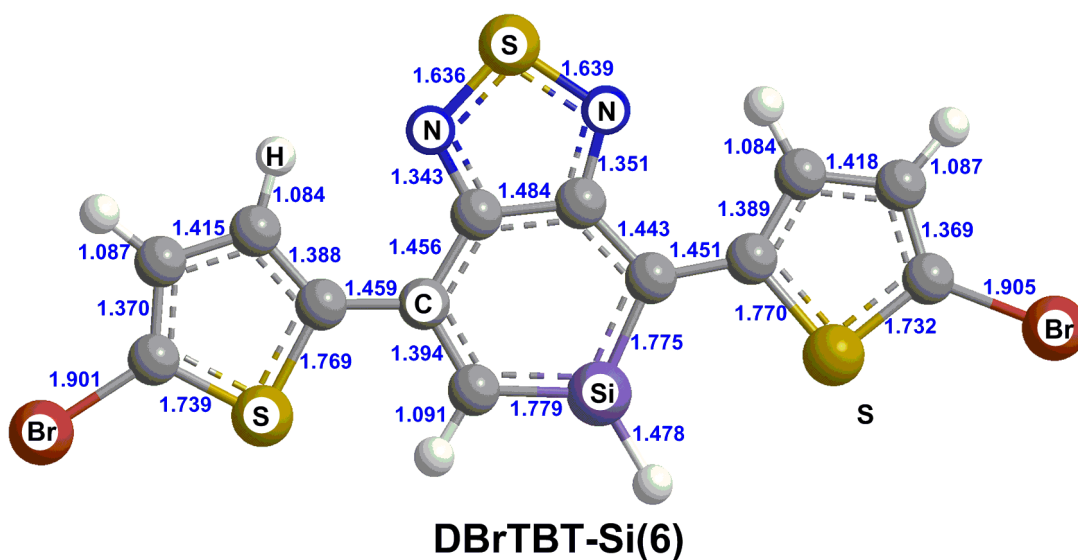

**Fig. S4.** Optimized geometric structures of the benzene ring C(6) atom replaced by Si atom in the DBrTBT, DBrTBT-Si(6) for short. The structural parameters were clearly labeled. The unit of bond length is Å.

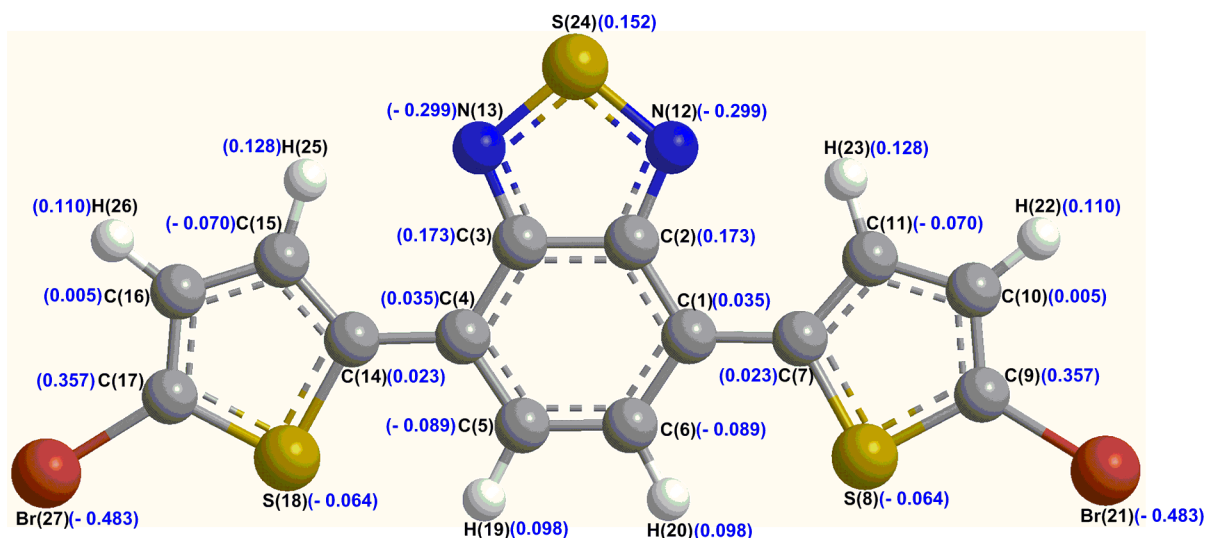

**DBrTBT**

**Fig. S5.** Mulliken atomic charges of the DBrTBT. The unit of charge is e.

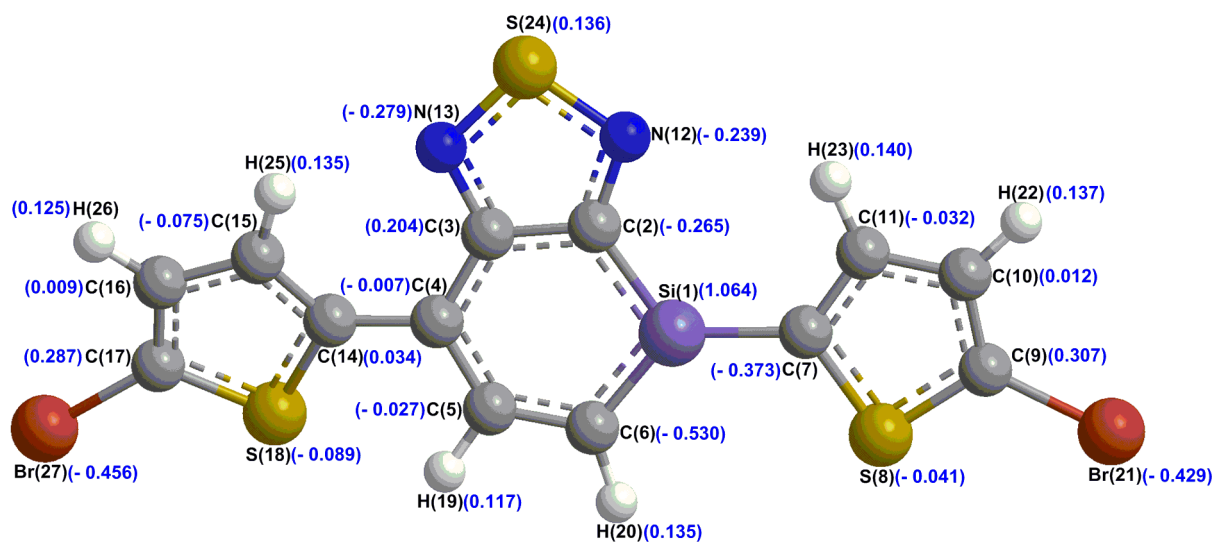

**DBrTBT-Si(1)**

**Fig. S6.** Mulliken atomic charges of the DBrTBT-Si(1). The unit of charge is e.

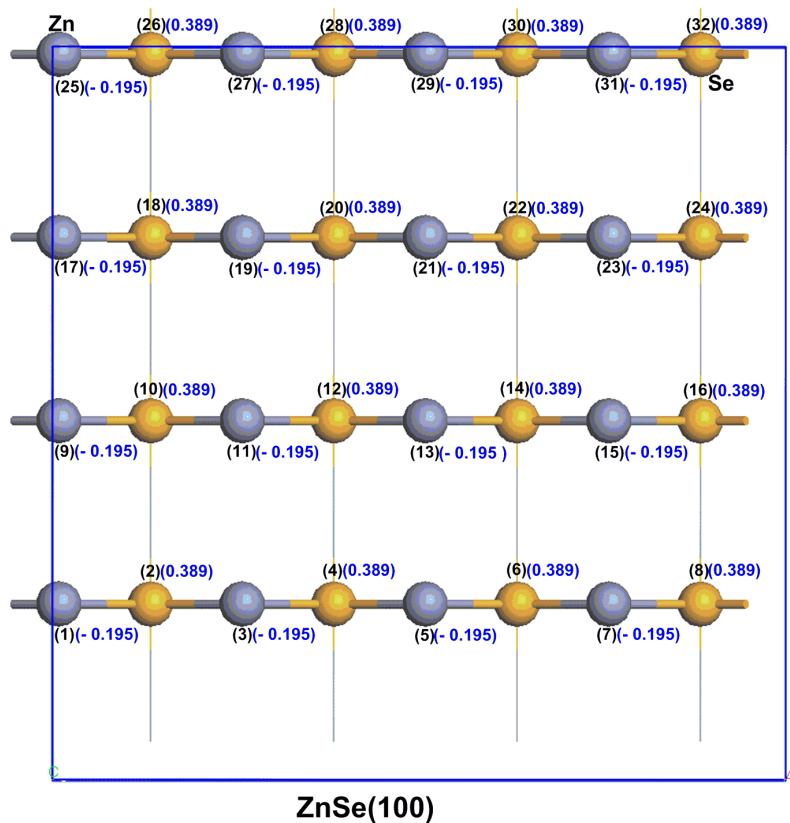

**Fig. S7.** Mulliken atomic charges of the first layer Zn and the second layer Se atoms on the ZnSe(100). The unit of charge is e.

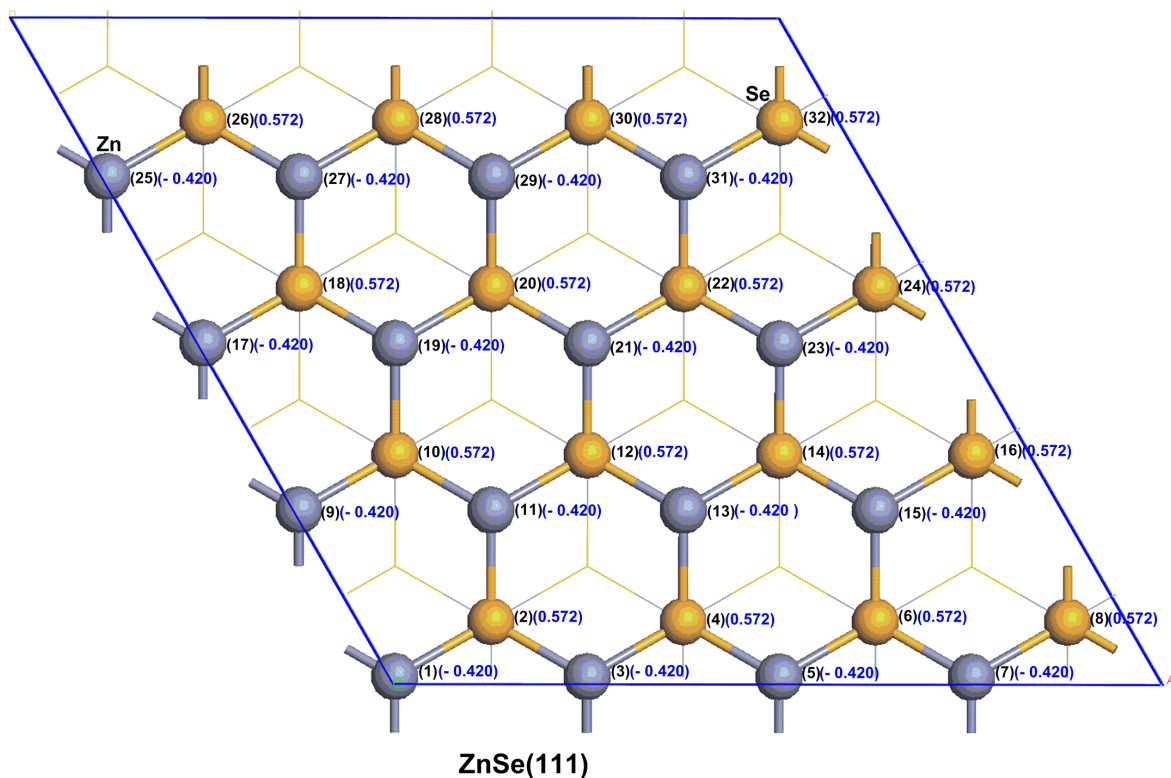

**Fig. S8.** Mulliken atomic charges of the first layer Zn and the second layer Se atoms on the ZnSe(111). The unit of charge is e.

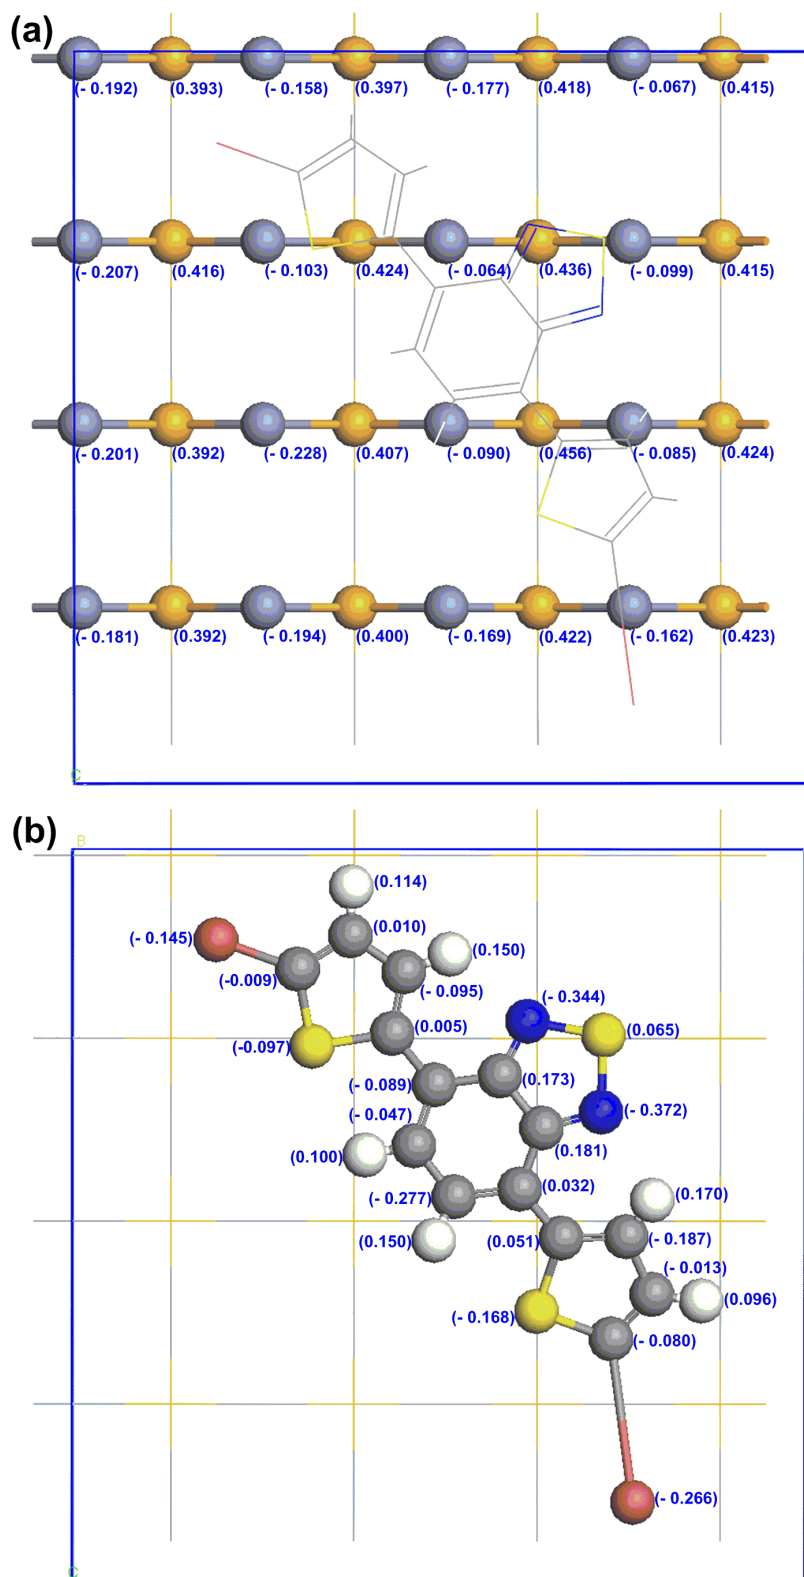

### ZnSe(100)-DBrTBT

**Fig. S9.** Mulliken atomic charges of part of the atoms on the ZnSe(100)-DBrTBT. The unit of charge is e. (a) Mulliken atomic charges of the first layer Zn and the second layer Se atoms on the ZnSe(100) surface and (b) Mulliken atomic charges of the DBrTBT.

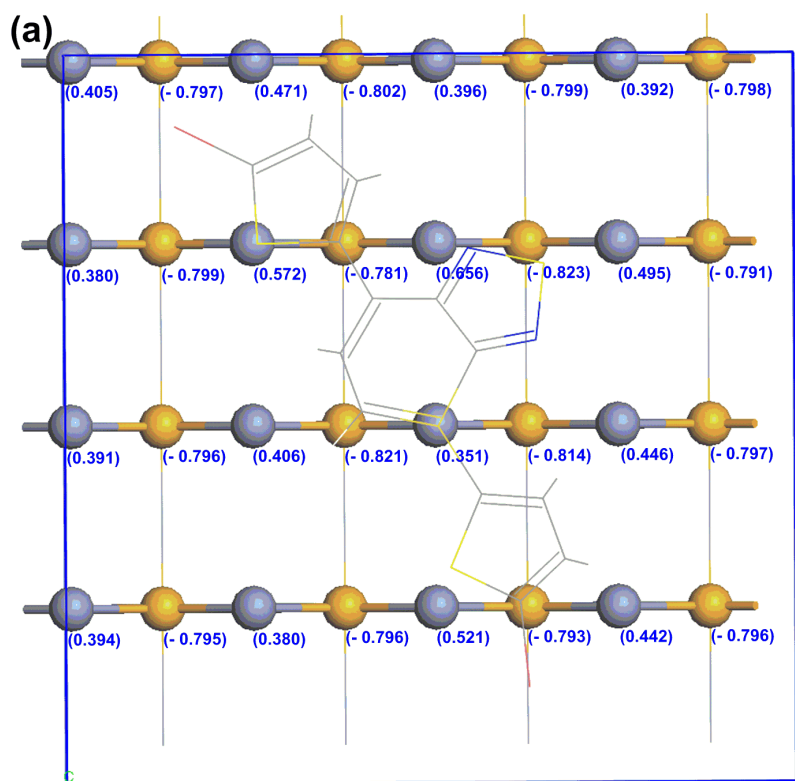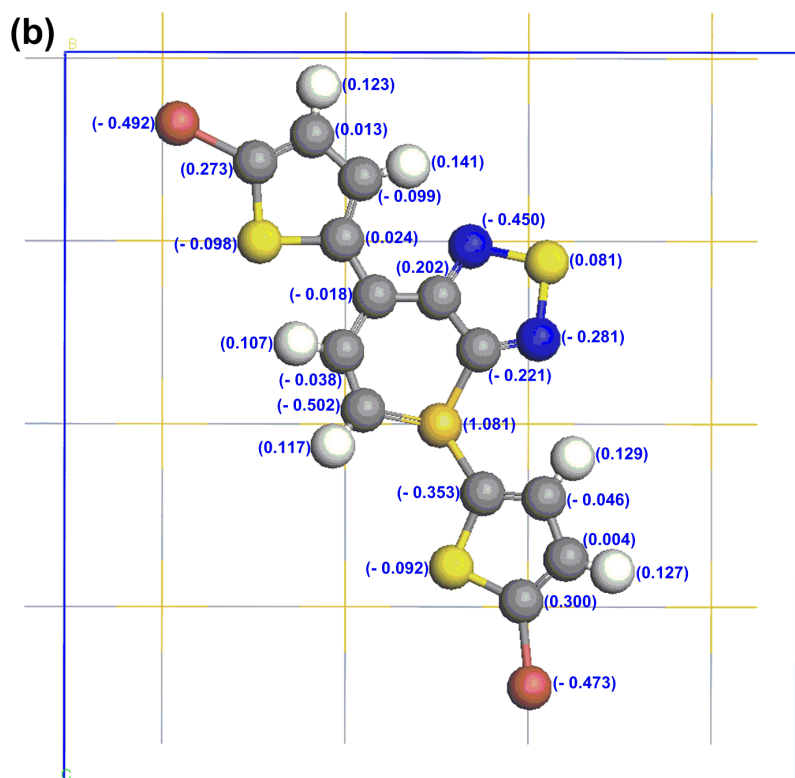

### ZnSe(100)-DBrTBT-Si(1)

**Fig. S10.** Mulliken atomic charges of part of the atoms on the ZnSe(100)-DBrTBT-Si(1). The unit of charge is e. (a) Mulliken atomic charges of the first layer Zn and the second layer Se atoms on the ZnSe(100) surface and (b) Mulliken atomic charges of the DBrTBT-Si(1).

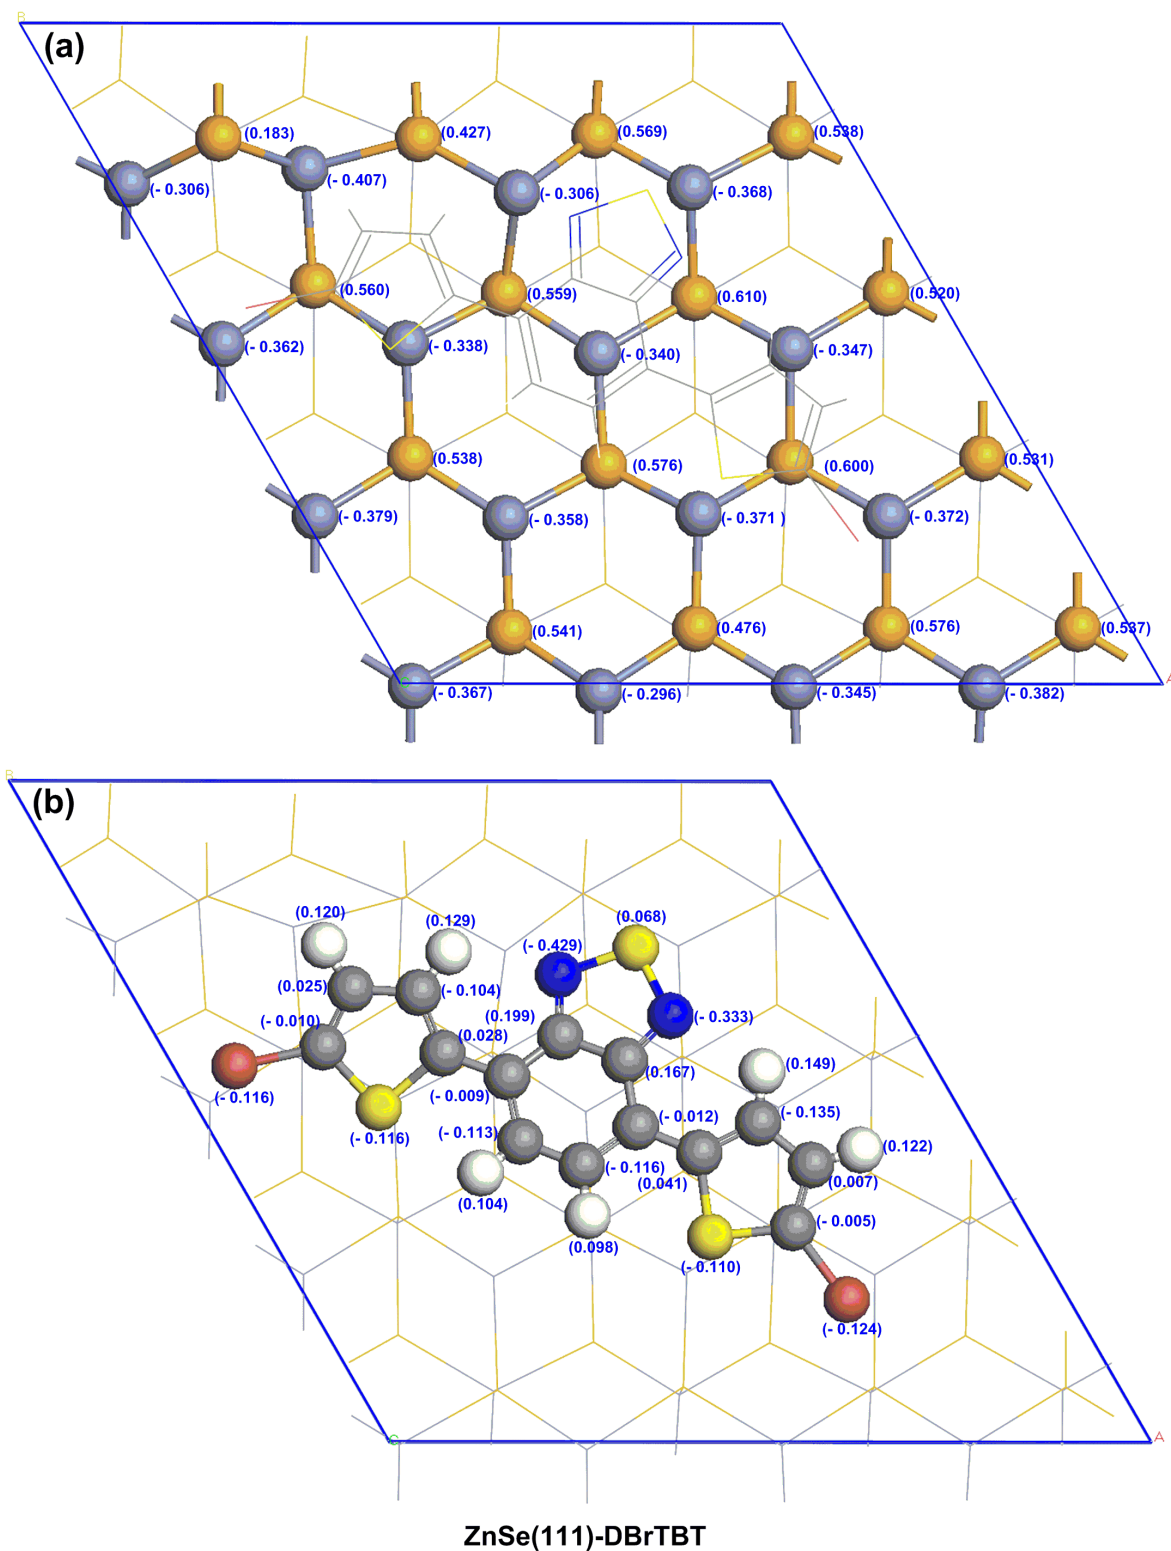

**Fig. S11.** Mulliken atomic charges of part of the atoms on the ZnSe(111)-DBrTBT. The unit of charge is e. (a) Mulliken atomic charges of the first layer Zn and the second layer Se atoms on the ZnSe(111) surface and (b) Mulliken atomic charges of the DBrTBT.



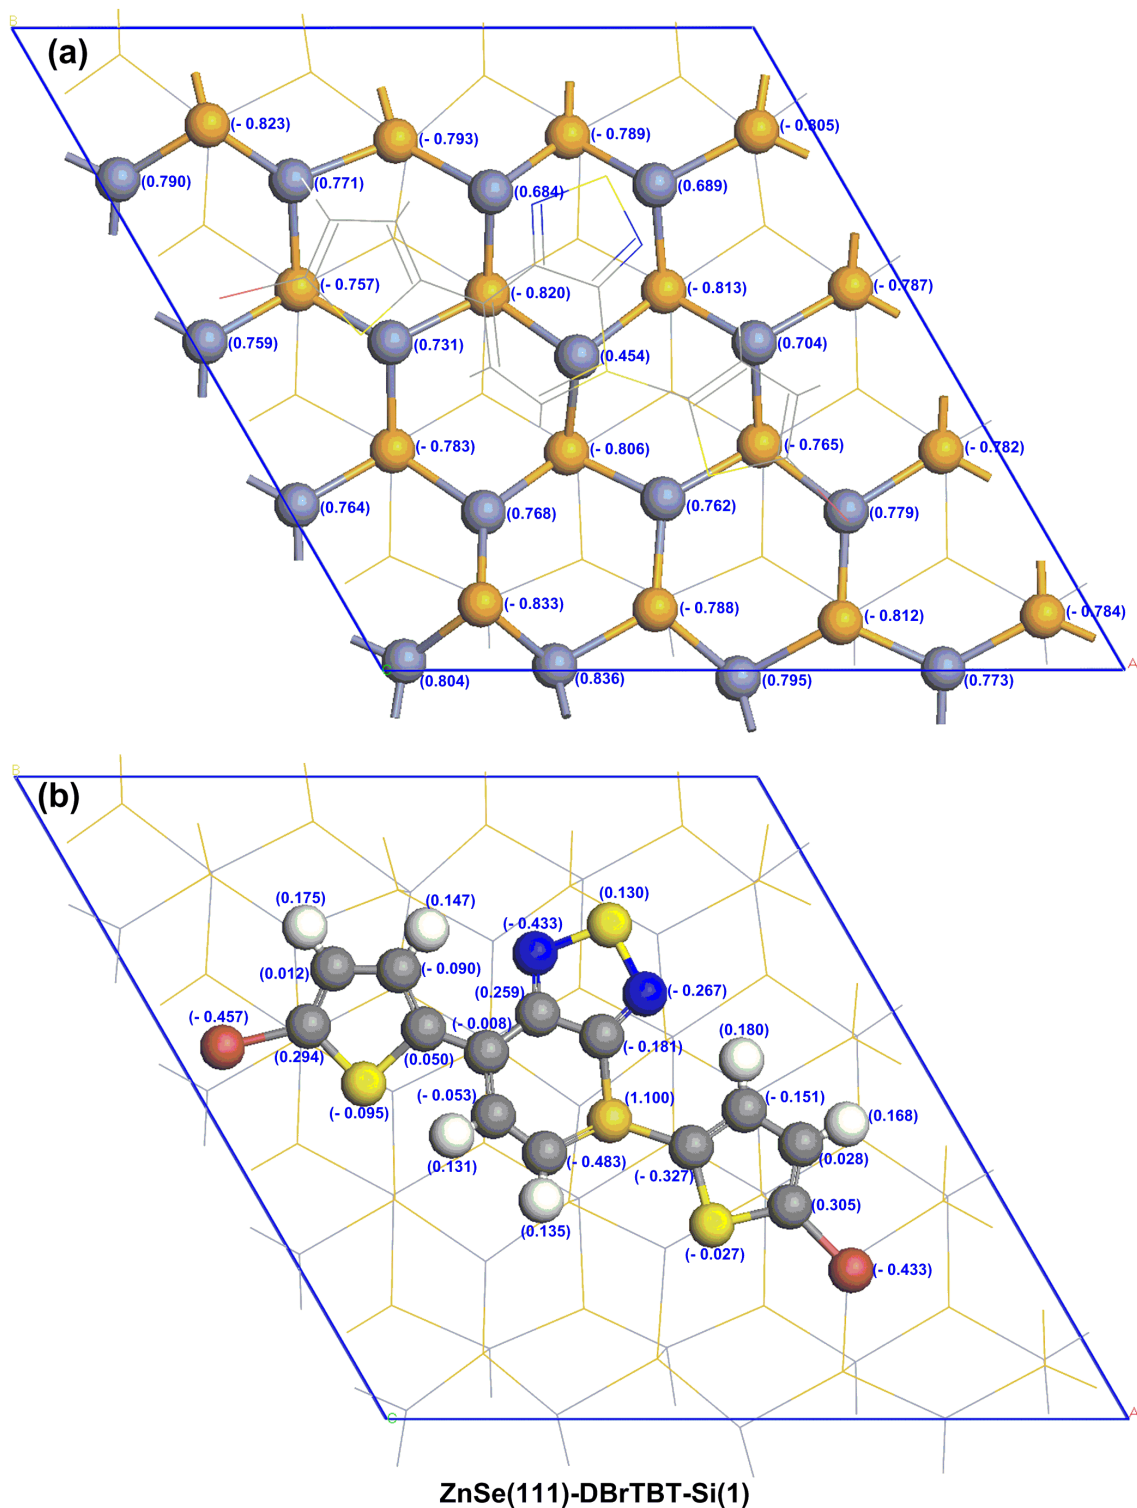

**Fig. S12.** Mulliken atomic charges of part of the atoms on the ZnSe(111)-DBrTBT-Si(1). The unit of charge is e. (a) Mulliken atomic charges of the first layer Zn and the second layer Se atoms on the ZnSe(111) surface and (b) Mulliken atomic charges of the DBrTBT-Si(1).

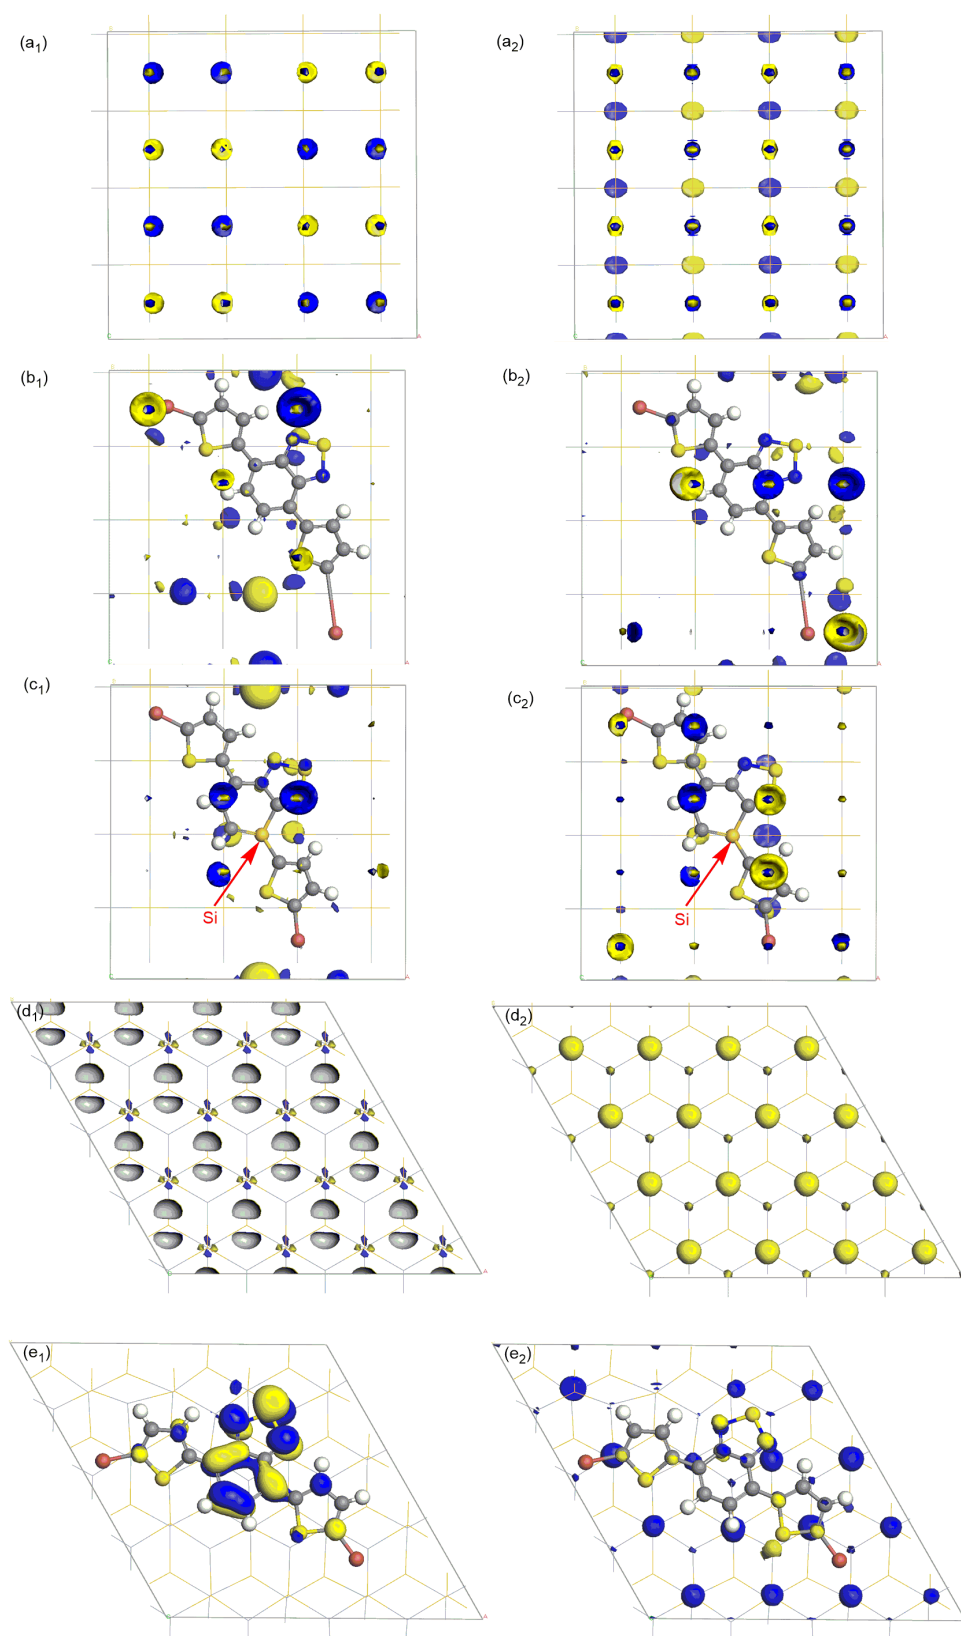

**Fig. S13.** Electron density plots (EDPs) of the highest occupied molecular orbital (HOMO) and the lowest unoccupied molecular orbital (LUMO). (a<sub>1</sub>) ZnSe(100)-HOMO, (a<sub>2</sub>)ZnSe(100)-LUMO, (b<sub>1</sub>) ZnSe(100)-DBrTBT-HOMO, (b<sub>2</sub>) ZnSe(100)-DBrTBT-LUMO, (c<sub>1</sub>) ZnSe(100)-DBrTBT-Si(1)-HOMO, (c<sub>2</sub>) ZnSe(100)-DBrTBT-Si(1)-LUMO, (d<sub>1</sub>) ZnSe(111)-HOMO, (d<sub>2</sub>) ZnSe(111)-LUMO, (e<sub>1</sub>) ZnSe(111)-DBrTBT-HOMO, and (e<sub>2</sub>) ZnSe(111)-DBrTBT-LUMO.

**Table S1.** The origin data of absorption bands for the DBrTBT and DBrTBT-Si(x) (x=1, 2, 6) by GGA/PW91 function and RPA TD-DFT method.

| <b>DBrTBT</b>     |                  | <b>DBrTBT-Si(1)</b> |                  | <b>DBrTBT-Si(2)</b> |                  | <b>DBrTBT-Si(6)</b> |                  |
|-------------------|------------------|---------------------|------------------|---------------------|------------------|---------------------|------------------|
| <b>Wavelength</b> | <b>Strength/</b> | <b>Wavelength</b>   | <b>Strength/</b> | <b>Wavelength</b>   | <b>Strength/</b> | <b>Wavelength</b>   | <b>Strength/</b> |
| <b>/nm</b>        | <b>a.u.</b>      | <b>/nm</b>          | <b>a.u.</b>      | <b>/nm</b>          | <b>a.u.</b>      | <b>/nm</b>          | <b>a.u.</b>      |
| 279               | 0.0182           | 297                 | 0.0128           | 315                 | 0.0006           | 318                 | 0.0001           |
| 309               | 0.0001           | 300                 | 0.0372           | 320                 | 0.0017           | 319                 | 0.0018           |
| 317               | 0.0071           | 324                 | 0.0096           | 328                 | 0.0005           | 320                 | 0.0366           |
| 323               | 0.0457           | 339                 | 0.0145           | 331                 | 0.0011           | 344                 | 0.0022           |
| 324               | 0.0024           | 347                 | 0.0729           | 339                 | 0.0722           | 347                 | 0.0009           |
| 325               | 0.0015           | 349                 | 0.0045           | 353                 | 0.0000           | 351                 | 0.0293           |
| 337               | 0.0271           | 356                 | 0.0546           | 367                 | 0.0316           | 359                 | 0.0076           |
| 362               | 0.0344           | 359                 | 0.0257           | 371                 | 0.0043           | 367                 | 0.0016           |
| 363               | 0.0003           | 364                 | 0.0006           | 384                 | 0.5641           | 379                 | 0.1790           |
| 374               | 0.6428           | 397                 | 0.3290           | 409                 | 0.0245           | 403                 | 0.3517           |
| 420               | 0.0055           | 431                 | 0.1921           | 444                 | 0.0752           | 440                 | 0.0184           |
| 559               | 0.3038           | 594                 | 0.1959           | 574                 | 0.3308           | 593                 | 0.2744           |
